# Supplementary material for: Experimental Model of Human Malignant Mesothelioma in Athymic Mice
Source: PubMed Central journal article supplement (PMC6073357; doi:10.3390/ijms19071881), 2018-06-26
Supplement: ijms-19-01881-s001.pdf [file ijms-19-01881-s001.pdf]

Supplementary figure

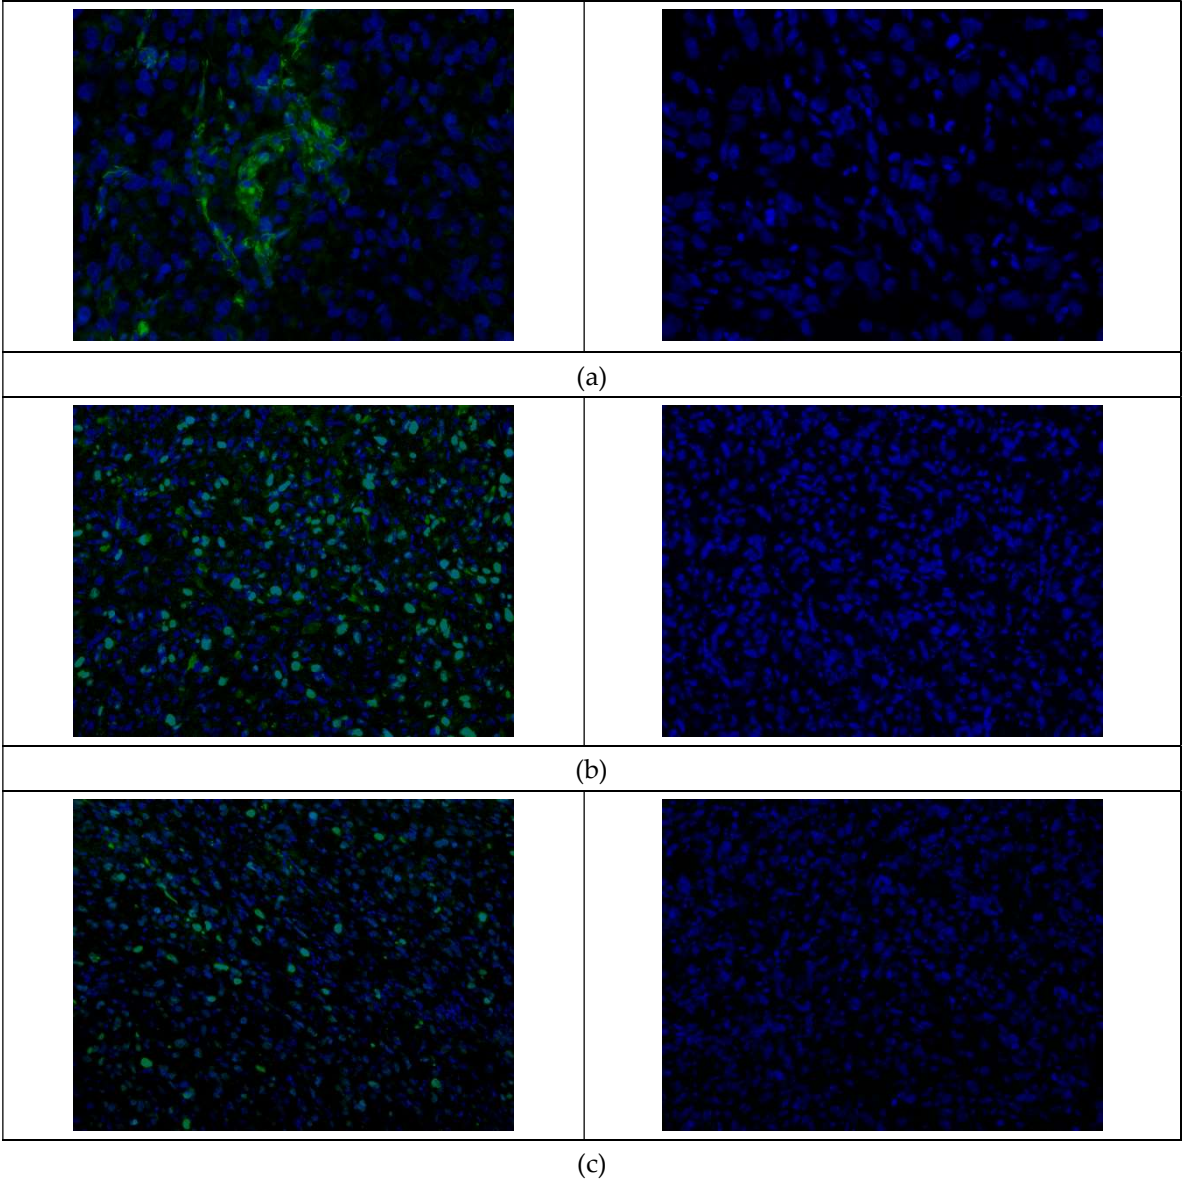

**Supplementary figure.** Staining of consecutive H2052/484 tumor sections performed with 1<sup>st</sup> and 2<sup>nd</sup> antibodies (left; positive control) or without the 1<sup>st</sup> antibody (right; negative control) **(a)** anti-CD31 (vascularization), **(b)** anti-Ki67 (cell proliferation), and **(c)** anti- $\gamma$ -H2AX (DNA damage and cell apoptosis).
